# Supplementary material for: Phosphoglycerate mutase 5 exacerbates cardiac ischemia-reperfusion injury through disrupting mitochondrial quality control
Source: PubMed Central journal article supplement — Redox Biol. 2020 Nov 1;38:101777. doi: 10.1016/j.redox.2020.101777 (PMC7658715; doi:10.1016/j.redox.2020.101777), 2020-11-01
Supplement: mmc1.pdf [file mmc1.pdf]

*Supplemental Figures and Tables*

**Phosphoglycerate mutase 5 exacerbates cardiac ischemia-reperfusion injury through  
disrupting mitochondrial quality control**

*Hang Zhu<sup>1\*</sup>, Ying Tan<sup>2\*</sup>, Wenjun Du<sup>3</sup>, Yang Li<sup>1</sup>, Sam Toan<sup>4</sup>, David Mui<sup>5</sup>, Feng Tian<sup>1</sup>, Hao  
Zhou<sup>1</sup>*

*<sup>1</sup>Department of Cardiology, Chinese PLA General Hospital, Beijing 100853, China*

*<sup>2</sup>Department of Critical Care Medicine, Nanfang Hospital, Southern Medical University,  
Guangzhou 510515, China*

*<sup>3</sup>Medical School of Chinese PLA, Chinese PLA General Hospital, Beijing, 100853, China*

*<sup>4</sup>Department of Chemical Engineering, University of Minnesota-Duluth, Duluth, MN 55812,  
USA*

*<sup>5</sup>Perelman School of Medicine, University of Pennsylvania, Philadelphia, PA 19104, USA*

**\*These authors contributed equally to this work.**

**Correspondence to:**

Dr. Hao Zhou<sup>a</sup> (e-mail: zhouhao301@outlook.com; zhouhao@plagh.org) and Dr. Feng Tian<sup>a</sup>  
(e-mail: tianfeng@126.com)

<sup>a</sup>Chinese PLA General Hospital, Medical School of Chinese PLA, Beijing, China.

**Running title:** PGAM5 induces cardiac I/R injury

## Supplemental Figures

### Supplemental Figure 1

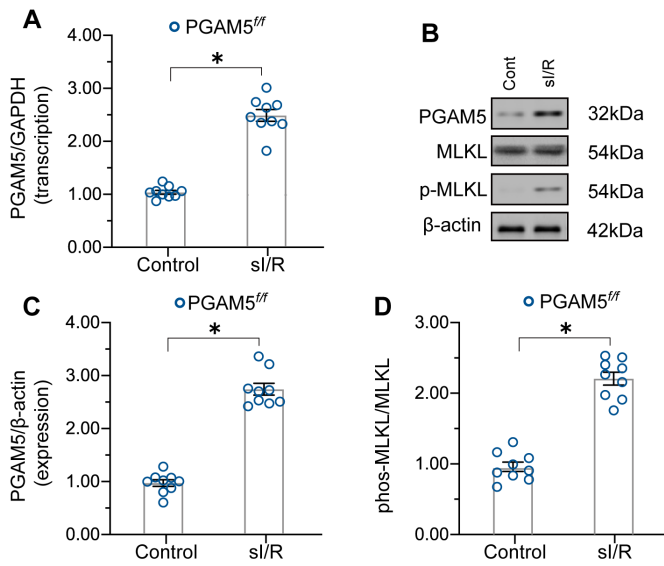

### Supplemental Figure 1. PGAM5 is upregulated in si/R-treated cardiomyocytes. (A)

Determination of PGAM5 transcript levels by qPCR in primary cardiomyocytes exposed to si/R. (B) Western blot analysis of PGAM5 and phospho-MLKL expression in cardiomyocytes exposed to si/R. (C-D) Quantitative analysis of PGAM5 and phospho-MLKL levels in si/R-treated cardiomyocytes using western blot data. Experiments were repeated three times with similar results. Data are shown as the means  $\pm$  SEM,  $n = 3$  independent cell isolations per group.

\* $p < 0.05$ .

**Supplemental Figure 2**

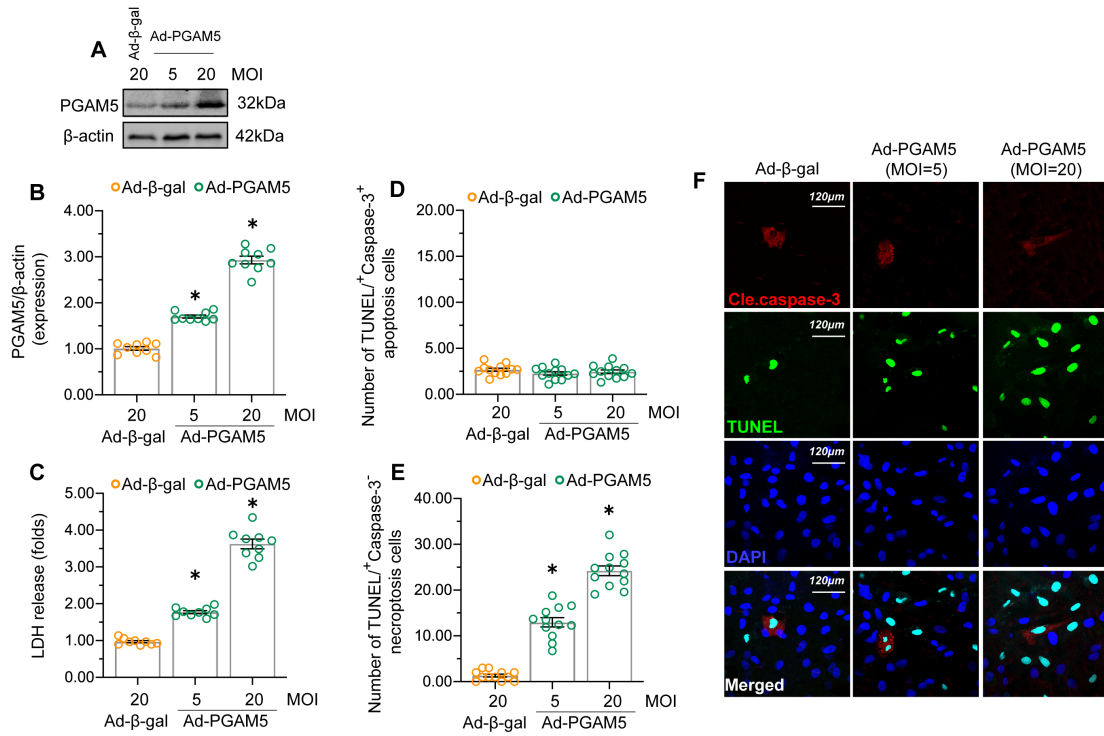

**Supplemental Figure 2. PGAM5 overexpression induces cardiomyocyte necroptosis.**

Adenoviruses encoding PGAM5 (Ad-PGAM5) or β-gal (Ad-β-gal; control) were transfected into cardiomyocytes isolated from wild-type C57BL/6N mice. **(A-B)** Western blot analysis of PGAM5 expression. **(C)** Cell death assessment by LDH release assay. **(D-F)** Representative images of TUNEL and caspase-3 double staining. Experiments were repeated three times with similar results. Data are shown as the means ± SEM, n = 3 independent cell isolations per group.

\*p<0.05.

### Supplemental Figure 3

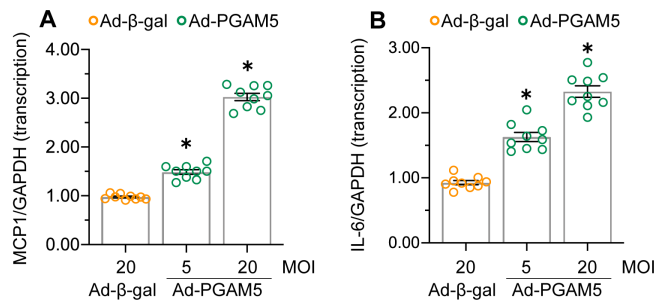

**Supplemental Figure 3. PGAM5 overexpression induces pro-inflammatory gene expression in cardiomyocytes. (A-B)** Analysis of IL-6 and MCP1 transcript levels by qPCR in Ad-PGAM5- and Ad-β-gal-transfected cardiomyocytes isolated from WT C57BL/6N mice. Experiments were repeated three times with similar results. Data are shown as the means ± SEM, n = 3 independent cell isolations per group. \*p<0.05.

### Supplemental Figure 4

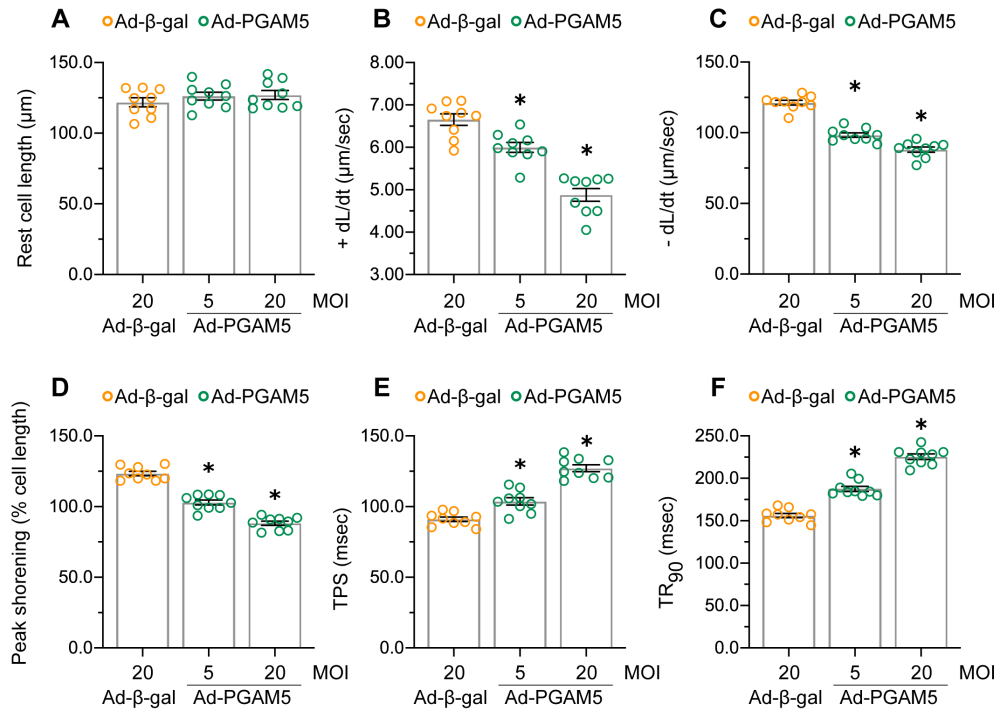

**Supplemental Figure 4. PGAM5 overexpression is associated with impaired cardiomyocyte contractility and relaxation.** (A-F) Analysis of mechanical properties of single, WT C57BL/6N cardiomyocytes transfected with Ad-PGAM5 or Ad-β-gal. +dL/dt: maximal velocity of shortening; -dL/dt: maximal velocity of relengthening; TPS: time-to-peak shortening; TR<sub>90</sub>: time-to-90% relengthening. Experiments were repeated three times with similar results. Data are shown as the means ± SEM, n = 70–80 cells from 2 mice per group. \*p < 0.05.

### Supplemental Figure 5

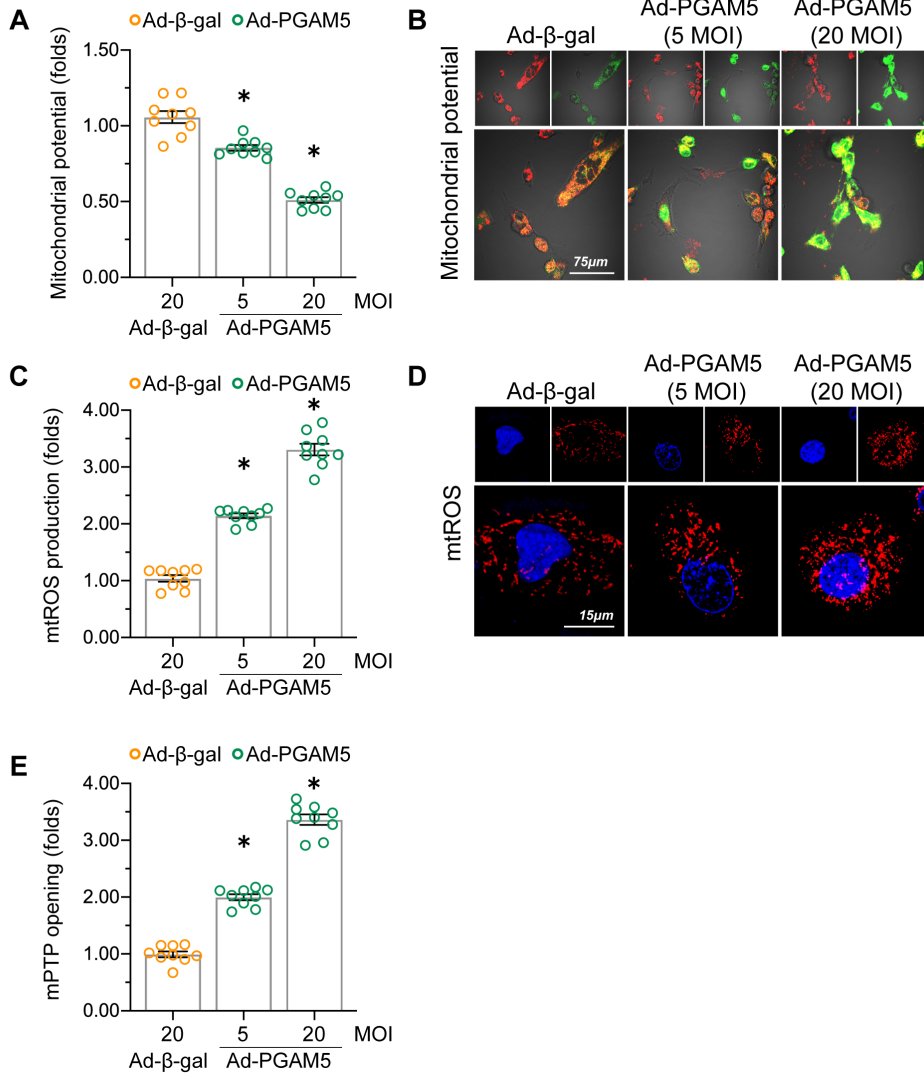

**Supplemental Figure 5. PGAM5 overexpression induces mitochondrial dysfunction in cardiomyocytes.** Adenoviruses encoding PGAM5 (Ad-PGAM5) or β-gal (Ad-β-gal; control) were transfected into cardiomyocytes isolated from WT C57BL/6N mice. **(A-B)** Representative images of cardiomyocytes loaded with the mitochondrial membrane potential indicator JC-1. **(C-D)** Representative images depicting mitochondrial ROS (mtROS) production (MitoSOX red staining) by cultured cardiomyocytes. **(E)** mPTP opening rate was estimated by analyzing arbitrary mPTP opening time. Experiments were repeated three times with similar results. Data are shown as the means ± SEM, n = 3 independent cell isolations per group. \*p<0.05.

### Supplemental Figure 6

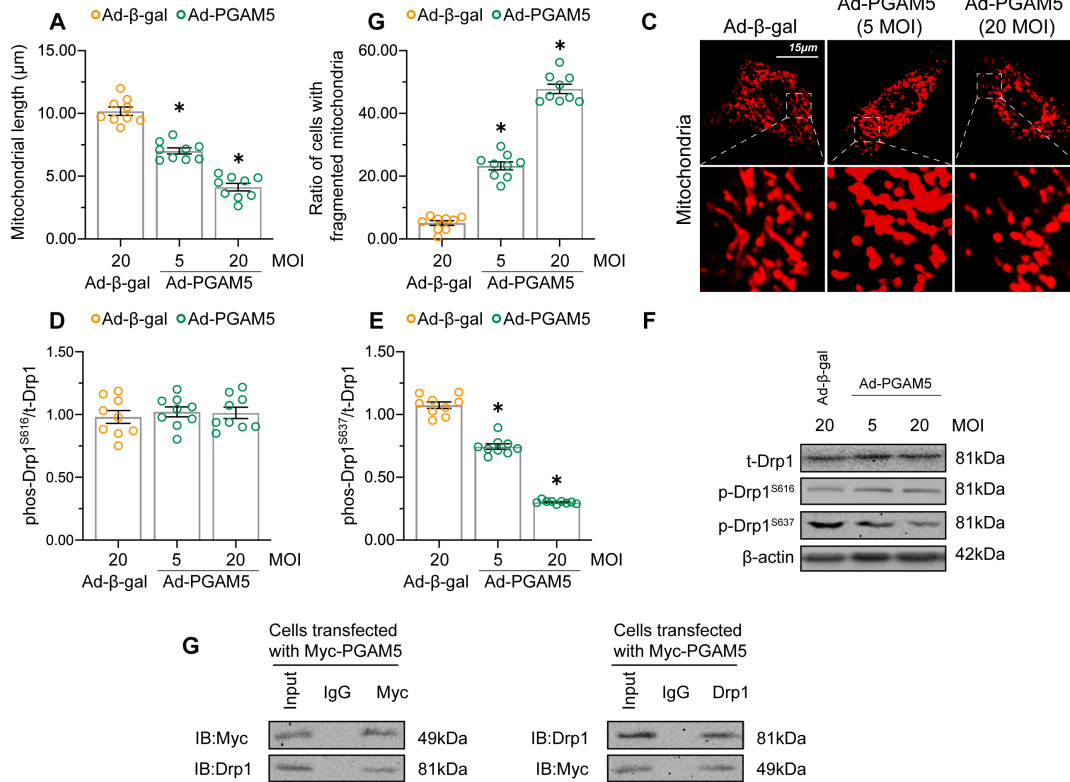

**Supplemental Figure 6. PGAM5 overexpression induces mitochondrial fission in cardiomyocytes.** Adenoviruses encoding PGAM5 (Ad-PGAM5) or β-gal (Ad-β-gal; control) were transfected into cardiomyocytes isolated from WT C57BL/6N mice. **(A-C)** Representative images of mitochondrial morphology. The average length of mitochondria and the number of cardiomyocytes with fragmented mitochondria were recorded. **(D-F)** Western blot analysis of p-Drp1<sup>S616</sup> and p-Drp1<sup>S637</sup> expression in cardiomyocytes. **(G)** Co-immunoprecipitation assays indicating interaction of endogenous Drp1 and PGAM5. Experiments were repeated three times with similar results. Data are shown as the means ± SEM, n = 3 independent cell isolations per group. \*p<0.05.

### Supplemental Figure 7

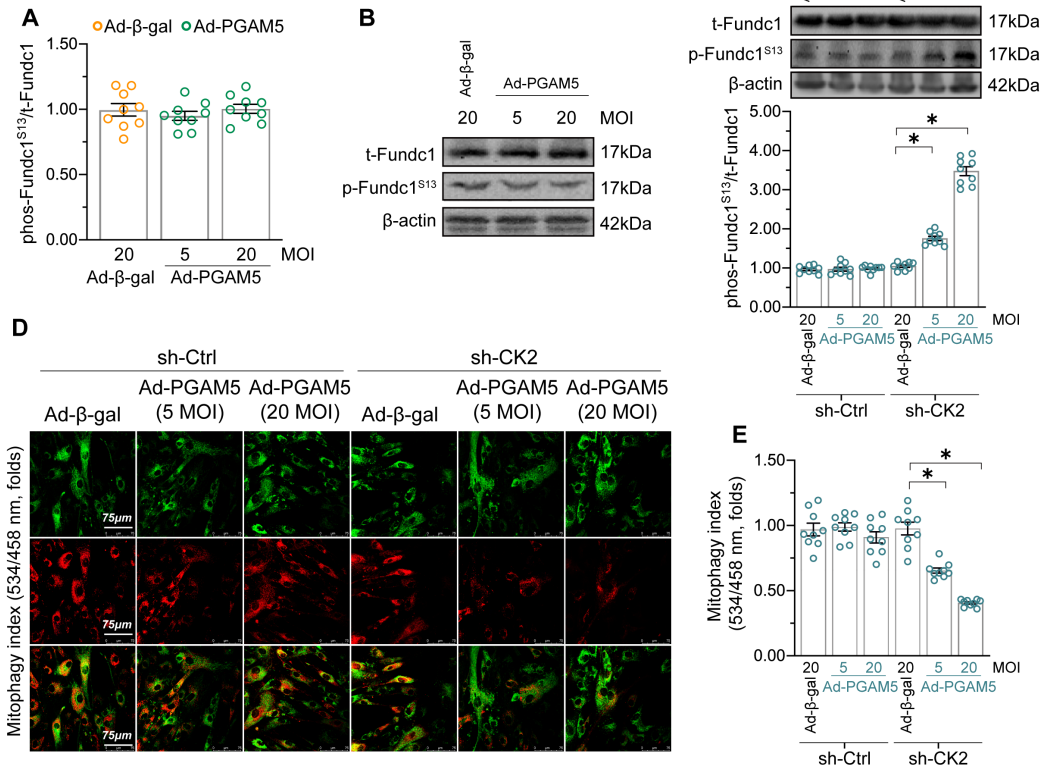

### Supplemental Figure 7. Mitophagy is not controlled by PGAM5 in cardiomyocytes. (A-B)

Western blot analysis of phospho-Fundc1<sup>S13</sup> expression in cardiomyocytes transfected with Ad-PGAM5 or Ad-β-gal. (C) Western blot analysis of phospho-Fundc1<sup>S13</sup> expression in control or CK2-knockdown cardiomyocytes transfected with Ad-PGAM5. (D-E) The mt-Kemia reporter assay was used to detect mitophagic activity. Experiments were repeated three times with similar results. Data are shown as the means ± SEM, n = 3 independent cell isolations per group.

\*p<0.05.



**Supplemental Table 1: Antibody information for western blot and immunofluorescence**

| Name              | Catalogue number                  | Dilution factor |
|-------------------|-----------------------------------|-----------------|
| PGAM5             | Abcam, #ab131552                  | 1:1000          |
| Drp1              | Abcam, #ab184247                  | 1:1000          |
| p-Drp1-Ser637     | Abcam, #ab193216                  | 1:1000          |
| OPA1              | Abcam, #ab157457                  | 1:1000          |
| Mfn2              | Abcam, #ab124773                  | 1:1000          |
| $\beta$ -actin    | Abcam, #ab8226                    | 1:1000          |
| MLKL              | Abcam, #ab184718                  | 1:1000          |
| p-MLKL            | Abcam, #ab196436                  | 1:1000          |
| Pro-caspase-3     | Abcam, #ab13847                   | 1:1000          |
| Cleaved caspase-3 | Abcam, #ab49822                   | 1:1000          |
| p62               | Abcam, #ab109012                  | 1:1000          |
| Tom20             | Abcam, #ab78547                   | 1:1000          |
| Lamp1             | Abcam, #ab208943                  | 1:1000          |
| Fundc1            | Abcam, #ab224722                  | 1:1000          |
| Bcl2              | Cell Signaling Technology, #3498  | 1:1000          |
| Bax               | Cell Signaling Technology, #14796 | 1:1000          |
| Caspase-9         | Cell Signaling Technology, #9504  | 1:1000          |
| p-Drp1-Ser616     | Cell Signaling Technology, #3455  | 1:1000          |

**Supplemental Table 2: Primers for qPCR**

| Gene  | Forward Prime                   | Reverse Prime                 |
|-------|---------------------------------|-------------------------------|
| IL-6  | 5'-CAGACTCGCGCCTCTAAGGAGT-3'    | 5'-GATAGCCGATCCGTCGAA-3'      |
| MCP1  | 5'- GGATGGATTGCACAGCCATT-3'     | 5'-GCGCCGACTCAGAGGTGT-3'      |
| PGAM5 | 5'-ATCTGGAGAAGACGAGTTGACA-3'    | 5'-CCTGTTCCCGACCTAATGGT -3'   |
| ND-1  | 5'-ATGGTCAGTCTGTCATGGTGGAAAC-3' | 5'- GCATAGCACAAGCAGCGACAAC-3' |
| COX-1 | 5'- GAAGAGACAGTGTTCATGTGGTGT-3' | 5'- TCCTGGGCCTTTCAGGAATA-3'   |

---

|            |                                 |                             |
|------------|---------------------------------|-----------------------------|
| Complex-IV | 5'-CAGGATTCTTCTGAGCGTTCTATCA-3' | 5'-AATTCCTGTTGGAGGTCAGCA-3' |
| GAPDH      | 5'-ACGGCAAATTCAACGGCACAGTCA-3'  | 5'-TGGGGGCATCGGCAGAAGG-3'   |

---
